# Supplementary material for: DksA Modulates Antimicrobial Susceptibility of Acinetobacter baumannii
Source: MDPI journal article supplement (doi:10.3390/antibiotics10121472), 2021-11-30
Supplement: s1 [file s1]

## Supplementary Materials

**Supplementary Table S1.** Primers used for the DNA cloning in this study.

| Primer              | Sequence (5'→3')*                                                |
|---------------------|------------------------------------------------------------------|
| ABK1_0298_UP_ApaI_F | <u>GTTGGGCCCCCGAAGAGGTAGGACGGTGAC</u>                            |
| ABK1_0298_UP_R      | <u>CTTAACCGTCACAATTACATAATAGGGCATTTCCTCATC</u><br>ATACACGTATTATC |
| ABK1_0298_down_16_F | <u>AATGCCCTATTATGTAATTGTGACGGTTAAGAATTCTC</u><br>CAG             |
| ABK1_0298_down_16_R | <u>CAAGTCAGCACGAACACGAATCAA</u> ACTTCTAAACCATG<br>AAGCGTTAT      |
| EryR_F              | TCGTGTTTCGTGCTGACTTG                                             |
| EryR_ApaI_R         | <u>GTTGGGCCCCGACCTCTTTAGCTCCTTGGAAGC</u>                         |

\* Underlined sequences indicate regions that are not complementary to the templates.

**Supplementary Table S2.** Primers used for qPCR in this study.

| Primers    | Sequence (5' to 3')         | Target genes                          |
|------------|-----------------------------|---------------------------------------|
| 16S rRNA-F | GCACAAGCGGTGGAGCAT          | 16S rRNA for ATCC 17978 and 1656-2    |
| 16S rRNA-R | CGAAGGCACCAATCCATCTC        |                                       |
| DksA-F     | TCTTGGGTAGCACGGTCATTT       | <i>dksA</i> for ATCC 17978 and 1656-2 |
| DksA-R     | GGAAGGACAGCTCGAGCATT        |                                       |
| AdeB-F     | GCACAACCAGCATCACAGAAA       | <i>adeB</i> for ATCC 17978            |
| AdeB-R     | AAAAGCAGTCTGAATCACAAATGG    |                                       |
| AdeB-F     | CCTTGTGGCAACCCTTCATT        | <i>adeB</i> for 1656-2                |
| AdeB-R     | CCTGCTTTACTGGCTGCTCAA       |                                       |
| AdeI-F     | TGGTTATTCTACAATTCGCTCTCCTAT | <i>adeI</i> for ATCC 17978 and 1656-2 |
| AdeI-R     | CAAAGCACCCAGCCGTTACTG       |                                       |
| AdeJ-F     | GCGGGCAGCCGTATGA            | <i>adeJ</i> for ATCC 17978 and 1656-2 |
| AdeJ-R     | ACGCCGAGAATGGAACCA          |                                       |
| TetA-F     | GGCAAAAATCATCCAACCACTT      | <i>tetA</i> for ATCC 17978            |
| TetA-R     | CGTGCTAATCGGTATTGCTTGTT     |                                       |
| AbeM-F     | GCCCAGTTCTTTTCGCCATA        | <i>abeM</i> for ATCC 17978            |
| AbeM-R     | CCACTTTCTCTTGCCATTGCT       |                                       |
| AbeM-F     | GAAGCCCAGTTCTTTTCACCATA     | <i>abeM</i> for 1656-2                |
| AbeM-R     | CCACTTTCTCTTGCCATTGCT       |                                       |

(A)

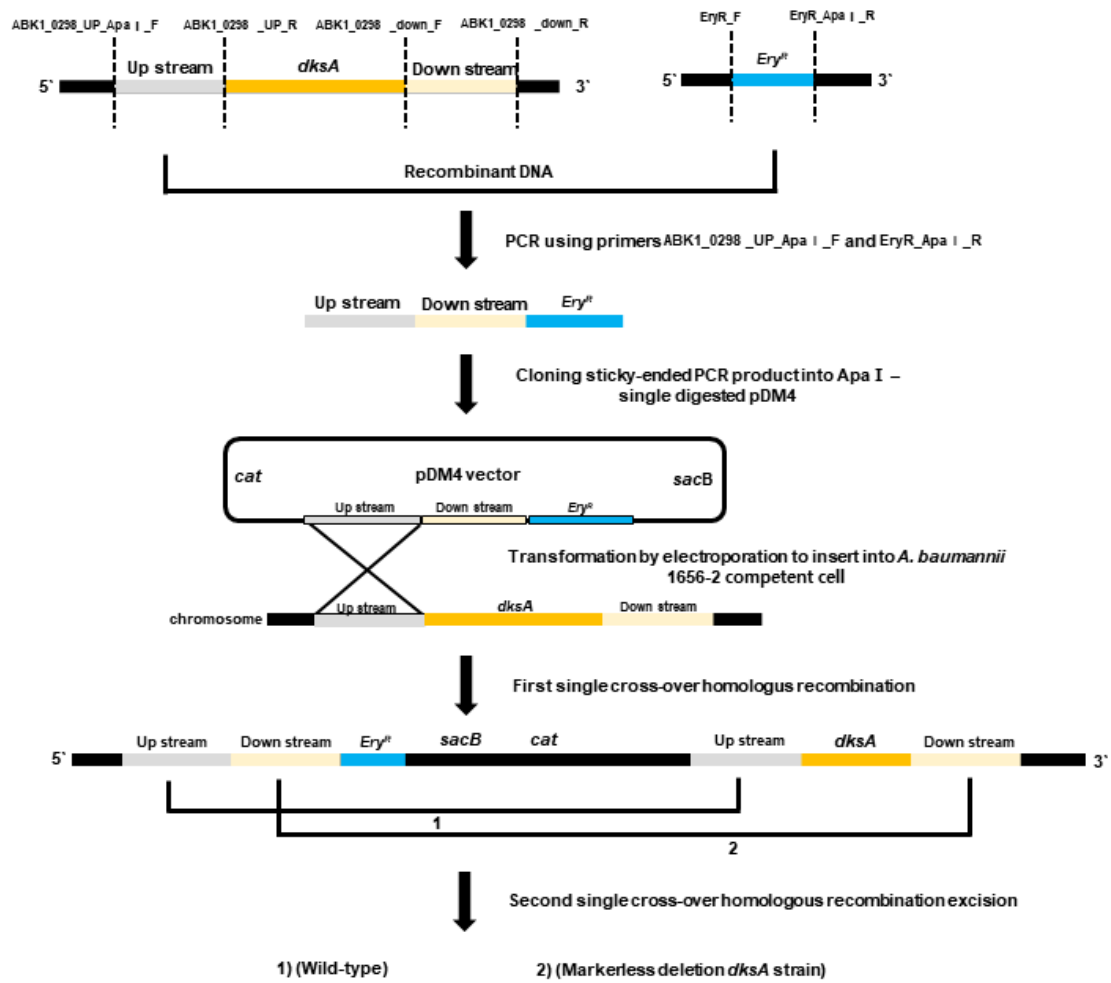

(B)

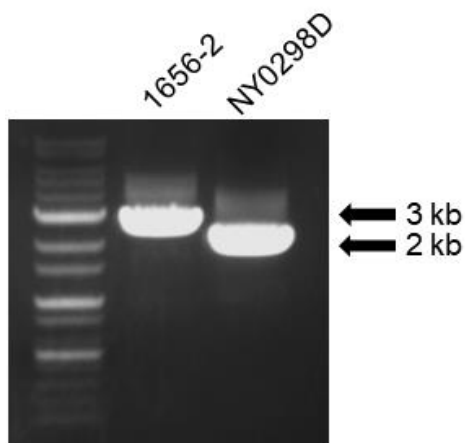

(C)

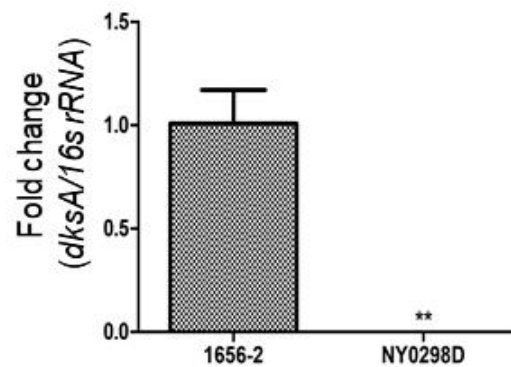

**Supplementary Figure S1.** Construction of the  $\Delta dksA$  mutant strain. **(A)** Construction of  $\Delta dksA$  mutant (NY0298D) in *A. baumannii* 1656-2. **(B)** The deletion of *dksA* in the NY0298D strain was confirmed by PCR using the primers ABK1\_0298\_UP\_ApaI\_F and ABK1\_0298\_down\_16\_R (Supplementary Table S1). The WT WT 1656-2 and NY0298D strains had amplicon sizes of 2,601 bp and 2,070 bp, respectively. **(C)** The expression of *dksA* was determined in the WT and  $\Delta dksA$  mutant strains using qPCR. The data are presented as mean  $\pm$  SD of three independent experiments. \*\*  $p < 0.005$  compared to WT strain.
